# Supplementary material for: Comparative effectiveness and safety of Chinese medicine belly button application for childhood diarrhea: a Bayesian network meta-analysis of randomized controlled trials
Source: PubMed Central journal article supplement (PMC10436529; doi:10.3389/fped.2023.1180694), 2023-08-04
Supplement: Datasheet2.pdf [file Datasheet2.pdf]

## *Supplementary Material*

# Comparative effectiveness and safety of Chinese medicine belly button application for childhood diarrhea: A bayesian network meta-analysis of randomized controlled trials

Zhi-jun Bu<sup>1†</sup>, Yan-ni Liu<sup>2†</sup>, Md. Shahjalal<sup>3</sup>, You-you Zheng<sup>1</sup>, Cheng-jiang Liu<sup>4</sup>, Meng-meng Ye<sup>5</sup>, Jin-yang Xu<sup>1</sup>, Xin-yao Peng<sup>1</sup>, Xue-hui Wang<sup>1</sup>, Xu Chen<sup>2</sup>, Jian-ping Liu<sup>1</sup>, Hui-lan Liu<sup>2\*</sup>, and Zhao-lan Liu<sup>1\*</sup>

†These authors contributed equally to this work and share first authorship.

\* **Correspondence:** Prof. Huilan-Liu and Prof. Zhaolan-Liu, Centre for Evidence-Based Chinese Medicine, Beijing University of Chinese Medicine, Sunshine South Street, Fangshan District, Beijing 102400, P. R. China. Tel: (+86) 010-64286757, E-mail: lzl1019@163.com.

### 1 Supplementary file 1

Table file 1, PRISMA checklist for comparative effectiveness and safety of Chinese medicine belly button application for childhood diarrhea.

| Section/Topic                         | Item # | Checklist Item                                                                                                                                                                                                                                                                                                                                                                                                                                                                      | Reported on Page # |
|---------------------------------------|--------|-------------------------------------------------------------------------------------------------------------------------------------------------------------------------------------------------------------------------------------------------------------------------------------------------------------------------------------------------------------------------------------------------------------------------------------------------------------------------------------|--------------------|
| <b>TITLE</b><br>Title                 | 1      | Identify the report as a systematic review incorporating a network meta-analysis (or related form of meta-analysis).                                                                                                                                                                                                                                                                                                                                                                | Page 1.            |
| <b>ABSTRACT</b><br>Structured summary | 2      | Provide a structured summary including, as applicable:<br><br><b>Background:</b> main objectives<br><br><b>Methods:</b> data sources; study eligibility criteria, participants, and interventions; study appraisal; and synthesis methods, such as network meta-analysis.<br><br><b>Results:</b> number of studies and participants identified; summary estimates with corresponding confidence/credible intervals; treatment rankings may also be discussed. Authors may choose to | Page 1.            |

|                           |   |                                                                                                                                                                                                                                                                                                                 |                                                                                           |
|---------------------------|---|-----------------------------------------------------------------------------------------------------------------------------------------------------------------------------------------------------------------------------------------------------------------------------------------------------------------|-------------------------------------------------------------------------------------------|
|                           |   | <p>summarize pairwise comparisons against a chosen treatment included in their analyses for brevity.</p> <p><b>Discussion/Conclusions:</b> limitations; conclusions and implications of findings.</p> <p><b>Other:</b> primary source of funding; systematic review registration number with registry name.</p> |                                                                                           |
| <b>INTRODUCTION</b>       | 3 | Describe the rationale for the review in the context of what is already known, including mention of why a network meta-analysis has been conducted.                                                                                                                                                             | Page 2. In the <b>1. Introduction</b> section                                             |
| Rationale                 |   |                                                                                                                                                                                                                                                                                                                 |                                                                                           |
| Objectives                | 4 | Provide an explicit statement of questions being addressed, with reference to participants, interventions, comparisons, outcomes, and study design (PICOS).                                                                                                                                                     | Page 3. In the <b>1. Introduction</b> section                                             |
| <b>METHODS</b>            | 5 | Indicate whether a review protocol exists and if and where it can be accessed (e.g., Web address); and, if available, provide registration information, including registration number.                                                                                                                          | Page 3. In the <b>2. Materials and methods</b> section                                    |
| Protocol and registration |   |                                                                                                                                                                                                                                                                                                                 |                                                                                           |
| Information sources       | 6 | Describe all information sources (e.g., databases with dates of coverage, contact with study authors to identify additional studies) in the search and date last searched.                                                                                                                                      | Page 4. In the <b>2.2. Search strategy</b> of the <b>2. Materials and methods</b> section |

|                                |           |                                                                                                                                                                                                                                                                                                                                                                            |                                                                                                |
|--------------------------------|-----------|----------------------------------------------------------------------------------------------------------------------------------------------------------------------------------------------------------------------------------------------------------------------------------------------------------------------------------------------------------------------------|------------------------------------------------------------------------------------------------|
| Search                         | 7         | Present full electronic search strategy for at least one database, including any limits used, such that it could be repeated.                                                                                                                                                                                                                                              | Page 4. In the 2.2. <b>Search strategy</b> of the <b>2. Materials and methods</b> section      |
| Eligibility criteria           | 8         | Specify study characteristics (e.g., PICOS, length of follow-up) and report characteristics (e.g., years considered, language, publication status) used as criteria for eligibility, giving rationale. Clearly describe eligible treatments included in the treatment network, and note whether any have been clustered or merged into the same node (with justification). | Page 3. In the 2.1. <b>Eligibility criteria</b> of the <b>2. Materials and methods</b> section |
| Study selection                | 9         | State the process for selecting studies (i.e., screening, eligibility, included in systematic review, and, if applicable, included in the meta-analysis).                                                                                                                                                                                                                  | Page 4. In the 2.3. <b>Study selection</b> of the <b>2. Materials and methods</b> section      |
| Data collection process        | 10        | Describe method of data extraction from reports (e.g., piloted forms, independently, in duplicate) and any processes for obtaining and confirming data from investigators.                                                                                                                                                                                                 | Page 4. In the 2.3. <b>Study selection</b> of the <b>2. Materials and methods</b> section      |
| Data items                     | 11        | List and define all variables for which data were sought (e.g., PICOS, funding sources) and any assumptions and simplifications made.                                                                                                                                                                                                                                      | Page 4. In the 2.3. <b>Study selection</b> of the <b>2. Materials and methods</b> section      |
| <b>Geometry of the network</b> | <b>S1</b> | Describe methods used to explore the geometry of the treatment network under study and potential biases related to it. This should include how the evidence base has been graphically summarized for presentation, and what characteristics were compiled and used to describe the evidence base to readers.                                                               | Page 4. In the 2.5. <b>Data analysis</b> of the <b>2. Materials and methods</b> section        |

|                                        |           |                                                                                                                                                                                                                                                                                                                                   |                                                                                                   |
|----------------------------------------|-----------|-----------------------------------------------------------------------------------------------------------------------------------------------------------------------------------------------------------------------------------------------------------------------------------------------------------------------------------|---------------------------------------------------------------------------------------------------|
| Risk of bias within individual studies | 12        | Describe methods used for assessing risk of bias of individual studies (including specification of whether this was done at the study or outcome level), and how this information is to be used in any data synthesis.                                                                                                            | Page 4. In the 2.4. <b>Risk of bias assessment</b> of the <b>2. Materials and methods</b> section |
| Summary measures                       | 13        | State the principal summary measures (e.g., risk ratio, difference in means). Also describe the use of additional summary measures assessed, such as treatment rankings and surface under the cumulative ranking curve (SUCRA) values, as well as modified approaches used to present summary findings from meta-analyses.        | Page 4. In the 2.5. <b>Data analysis</b> of the <b>2. Materials and methods</b> section           |
| Planned methods of analysis            | 14        | Describe the methods of handling data and combining results of studies for each network meta-analysis. This should include, but not be limited to:<br><br>Handling of multi-arm trials;<br><br>Selection of variance structure;<br><br>Selection of prior distributions in Bayesian analyses;<br><br>And Assessment of model fit. | Page 4. In the 2.5. <b>Data analysis</b> of the <b>2. Materials and methods</b> section           |
| <b>Assessment of Inconsistency</b>     | <b>S2</b> | Describe the statistical methods used to evaluate the agreement of direct and indirect evidence in the treatment network(s) studied. Describe efforts taken to address its presence when found.                                                                                                                                   | Page 4. In the 2.5. <b>Data analysis</b> of the <b>2. Materials and methods</b> section           |
| Risk of bias across studies            | 15        | Specify any assessment of risk of bias that may affect the cumulative evidence (e.g., publication bias, selective reporting within studies).                                                                                                                                                                                      | Page 8. In the 3.6. <b>Analysis of publication bias</b> of the <b>3. Results</b> section          |

|                                          |           |                                                                                                                                                                                                                                                                                                                                                |                                                                                             |
|------------------------------------------|-----------|------------------------------------------------------------------------------------------------------------------------------------------------------------------------------------------------------------------------------------------------------------------------------------------------------------------------------------------------|---------------------------------------------------------------------------------------------|
| Additional analyses                      | <b>16</b> | Describe methods of additional analyses if done, indicating which were pre-specified. This may include, but not be limited to, the following: Sensitivity or subgroup analyses; Meta-regression analyses; Alternative formulations of the treatment network; and Use of alternative prior distributions for Bayesian analyses (if applicable). | Page 4. In the 2.5. <b>Data analysis</b> of the <b>2.Materials and methods</b> section      |
| <b>RESULTS†</b><br>Study selection       | <b>17</b> | Give numbers of studies screened, assessed for eligibility, and included in the review, with reasons for exclusions at each stage, ideally with a flow diagram.                                                                                                                                                                                | Page 5. In the 3.1. <b>Study selection</b> of the <b>3.Results</b> section                  |
| <b>Presentation of network structure</b> | <b>S3</b> | Provide a network graph of the included studies to enable visualization of the geometry of the treatment network.                                                                                                                                                                                                                              | Page 6. In the 3.4.2 <b>Network meta-analysis</b> of the <b>3.Results</b> section           |
| <b>Summary of network geometry</b>       | <b>S4</b> | Provide a brief overview of characteristics of the treatment network. This may include commentary on the abundance of trials and randomized patients for the different interventions and pairwise comparisons in the network, gaps of evidence in the treatment network, and potential biases reflected by the network structure.              | Page 6. In the 3.4.2 <b>Network meta-analysis</b> of the <b>3.Results</b> section           |
| Study characteristics                    | <b>18</b> | For each study, present characteristics for which data were extracted (e.g., study size, PICOS, follow-up period) and provide the citations.                                                                                                                                                                                                   | Page 5. In the 3.2. <b>Study characteristics</b> of the <b>3.Results</b> section            |
| Risk of bias within studies              | <b>19</b> | Present data on risk of bias of each study and, if available, any outcome level assessment.                                                                                                                                                                                                                                                    | Page 5. In the 3.3. <b>Risk of bias of included studies</b> of the <b>3.Results</b> section |

|                                      |           |                                                                                                                                                                                                                                                                                                                                                                                                                                                       |                                                                                                              |
|--------------------------------------|-----------|-------------------------------------------------------------------------------------------------------------------------------------------------------------------------------------------------------------------------------------------------------------------------------------------------------------------------------------------------------------------------------------------------------------------------------------------------------|--------------------------------------------------------------------------------------------------------------|
| Results of individual studies        | <b>20</b> | For all outcomes considered (benefits or harms), present, for each study: 1) simple summary data for each intervention group, and 2) effect estimates and confidence intervals. Modified approaches may be needed to deal with information from larger networks.                                                                                                                                                                                      | Page 5. In the <b>3.Results</b> section                                                                      |
| Synthesis of results                 | <b>21</b> | Present results of each meta-analysis done, including confidence/credible intervals. In larger networks, authors may focus on comparisons versus a particular comparator (e.g. placebo or standard care), with full findings presented in an appendix. League tables and forest plots may be considered to summarize pairwise comparisons. If additional summary measures were explored (such as treatment rankings), these should also be presented. | Page 5. In the <b>3.4. Clinical effectiveness and 3.5 Secondary outcomes</b> of the <b>3.Results</b> section |
| <b>Exploration for inconsistency</b> | <b>S5</b> | Describe results from investigations of inconsistency. This may include such information as measures of model fit to compare consistency and inconsistency models, P values from statistical tests, or summary of inconsistency estimates from different parts of the treatment network.                                                                                                                                                              | Page 6. In the <b>3.4.1 Pairwise meta-analysis</b> of the <b>3.Results</b> section                           |
| Risk of bias across studies          | <b>22</b> | Present results of any assessment of risk of bias across studies for the evidence base being studied.                                                                                                                                                                                                                                                                                                                                                 | Page 5. In the <b>3.3. Risk of bias of included studies</b> of the <b>3.Results</b> section                  |
| Results of additional analyses       | <b>23</b> | Give results of additional analyses, if done (e.g., sensitivity or subgroup analyses, meta-regression analyses, alternative network geometries studied, alternative choice of prior distributions for Bayesian analyses, and so forth).                                                                                                                                                                                                               | Page 5. In the <b>3.4. Pairwise meta-analysis</b> of the <b>3.Results</b> section                            |

|                                          |           |                                                                                                                                                                                                                                                                                                                                                                                                                                |                                              |
|------------------------------------------|-----------|--------------------------------------------------------------------------------------------------------------------------------------------------------------------------------------------------------------------------------------------------------------------------------------------------------------------------------------------------------------------------------------------------------------------------------|----------------------------------------------|
| <b>DISCUSSION</b><br>Summary of evidence | <b>24</b> | Summarize the main findings, including the strength of evidence for each main outcome; consider their relevance to key groups (e.g., healthcare providers, users, and policy-makers).                                                                                                                                                                                                                                          | Page 8. In the <b>4.Discussion</b> section   |
| Strengths and limitation                 | <b>25</b> | Discuss limitations at study and outcome level (e.g., risk of bias), and at review level (e.g., incomplete retrieval of identified research, reporting bias). Comment on the validity of the assumptions, such as transitivity and consistency. Comment on any concerns regarding network geometry (e.g., avoidance of certain comparisons).                                                                                   | Page 10. In the <b>4.Discussion</b> section  |
| Conclusions                              | <b>26</b> | Provide a general interpretation of the results in the context of other evidence, and implications for future research.                                                                                                                                                                                                                                                                                                        | Page 10. In the <b>5.Conclusions</b> section |
| <b>FUNDING</b><br>Funding                | <b>27</b> | Describe sources of funding for the systematic review and other support (e.g., supply of data); role of funders for the systematic review. This should also include information regarding whether funding has been received from manufacturers of treatments in the network and/or whether some of the authors are content experts with professional conflicts of interest that could affect use of treatments in the network. | Page 11. In the <b>Funding</b> section       |

## 2 Supplementary file 2

Table file 2, The search strategy for the respective database.

| Database name | Search strategies                                                                                                           |
|---------------|-----------------------------------------------------------------------------------------------------------------------------|
| CNKI          | SU=('小儿腹泻'+ '儿童腹泻'+ '小儿泄泻'+ '儿童泄泻'+ '婴儿腹泻'+ '婴儿泄泻'+ '婴幼儿腹泻'+ '婴幼儿泄泻') AND SU=('脐疗'+ '中药敷贴'+ '脐针'+ '神阙敷贴'+ '脐贴') AND FT='随机' |
| Wanfang       | 主题:("小儿腹泻" or "儿童腹泻" or "小儿泄泻" or "儿童泄泻" or "婴儿腹泻" or "婴儿泄泻") and 主题:("脐疗" or "中药敷贴" or "脐针" or "神阙敷贴" or "脐贴") and 全部:(随机) |

|                  |                                                                                                                                                                                                                                                                                                                                                                                                                                                                                                                                                                                                                                               |
|------------------|-----------------------------------------------------------------------------------------------------------------------------------------------------------------------------------------------------------------------------------------------------------------------------------------------------------------------------------------------------------------------------------------------------------------------------------------------------------------------------------------------------------------------------------------------------------------------------------------------------------------------------------------------|
| VIP              | (M=(小儿腹泻 or 儿童腹泻 or 小儿泄泻 or 儿童泄泻 or 婴儿腹泻 or 婴儿泄泻) or K=(小儿腹泻 or 小儿腹泻 or 小儿泄泻 or 儿童泄泻 or 婴儿腹泻 or 婴儿泄泻)) and (M=(脐疗 or 中药敷贴 or 脐针 or 神阙敷贴 or 脐贴) or K=(脐疗 or 中药敷贴 or 脐针 or 神阙敷贴 or 脐贴)) and U=随机                                                                                                                                                                                                                                                                                                                                                                                                                                                |
| SinoMed          | #1 “腹泻 婴儿”[不加权: 扩展]<br>#2 “儿童”[不加权: 扩展]<br>#3 (“腹泻”[不加权: 扩展])(“泄泻”[不加权: 扩展])<br>#4 (#3) AND (#2)<br>#5 (#4) OR (#1)<br>#6 “小儿腹泻”[常用字段: 智能] OR “小儿泄泻”[常用字段: 智能] OR “儿童腹泻”[常用字段: 智能] OR “儿童泄泻”[常用字段: 智能] OR “婴儿腹泻”[常用字段: 智能] OR “婴儿泄泻”[常用字段: 智能]<br>#7 (#6) OR (#5)<br>#8 “脐疗”[常用字段: 智能] OR “中药敷贴”[常用字段: 智能] OR “脐针”[常用字段: 智能] OR “神阙敷贴”[常用字段: 智能] OR “脐贴”[常用字段: 智能]<br>#9 “随机”[全部字段: 智能]<br>#10 (#9) AND (#8) AND (#7)                                                                                                                                                                                                                         |
| Pubmed           | Search:(("Diarrhea, Infantile"[Mesh]) OR ((childhood diarrhea) OR (infantile diarrhea))) AND (random*) AND (("Umbilicus"[Mesh]) OR (((((((Shen que) OR (navel) OR (umbilicus) OR (acupoint application)) OR (cupoint point application) OR (Chinese medicine external application)) OR (umbilical compress therapy))))                                                                                                                                                                                                                                                                                                                        |
| Cochrane Library | #1 Search:Mesh descriptor: [Diarrhea, Infantile] explode all trees<br>#2 Search: infantile diarrhea<br>#3 Search: childhood diarrhea<br>#4 Search: #1 OR #2 OR #3<br>#5 Search:Mesh descriptor: [Umbilicus] explode all tress<br>#6 Search:acupoint application<br>#7 Search:acupoint point application<br>#8 Search:Chinese medicine application<br>#9 Search:external application of chinese medicine<br>#10 Search:umbilical compress therapy<br>#11 Search:shenque<br>#12 Search:navel<br>#13 Search:umbilicus<br>#14 Search:#5 OR #6 OR #7 OR #8 OR #9 OR #10 OR #11 OR #12 OR #13<br>#15 Search:random<br>#16 Search:#4 AND #14 AND #15 |

Abbreviations in Table file 2, CNKI, China National Knowledge Infrast ructure; SinoMed, the Chinese Biomedical Literature Database; WanFang, the WanFang Database; VIP, the Chinese Scientific Journals Full-Text Database.



### 3 Supplementary file 3

The forest plot Pairwise Meta-Analysis of clinical effectiveness.

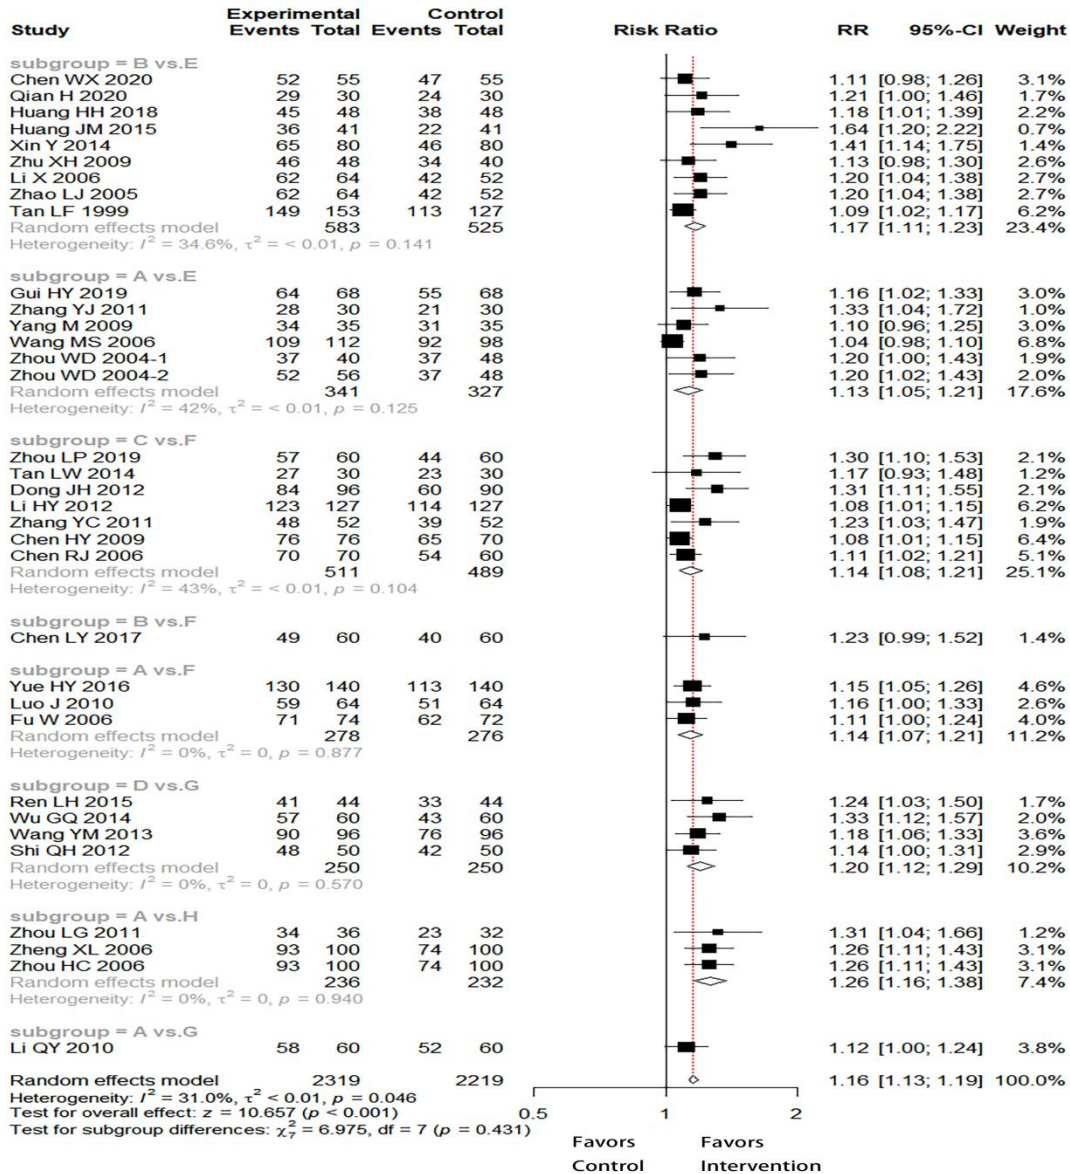

Supplementary Figure file 3, The forest plot Pairwise Meta-Analysis of clinical effectiveness. Abbreviations in Figure file 3, A: Chinese medicine belly button application. B: Chinese medicine belly button application plus montmorillonite powder. C: Chinese medicine belly button application plus montmorillonite powder plus microecologics. D: Chinese medicine belly button application plus montmorillonite powder plus anti-infectives. E: montmorillonite powder. F: montmorillonite powder plus microecologics. G: montmorillonite powder plus anti-infectives. H: montmorillonite powder plus anti-infectives plus microecologics.

4 Supplementary file 4

The subgroup analysis of clinical effectiveness.

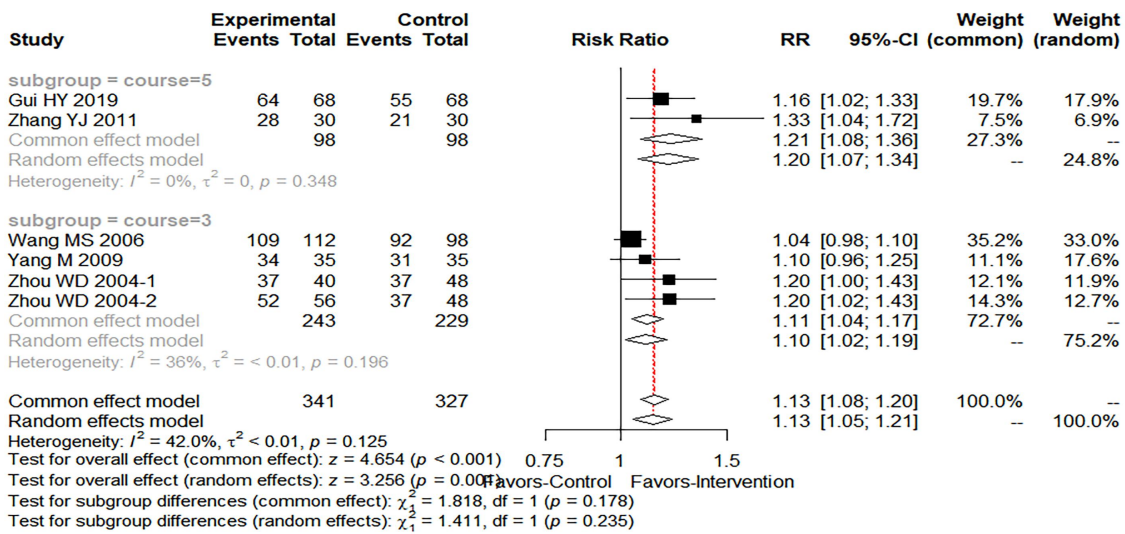

(A)

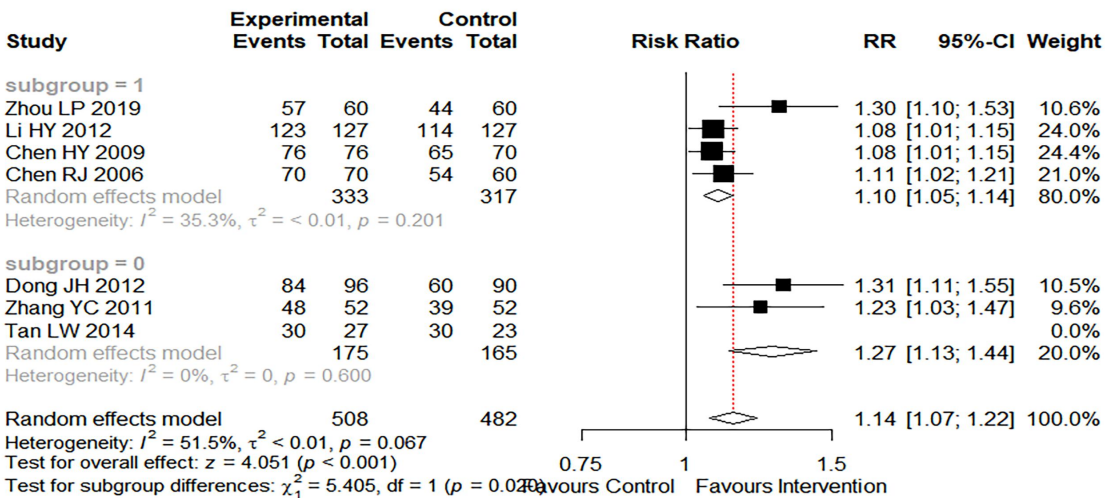

(B)

Supplementary Figure file 4, The subgroup analysis of clinical effectiveness. (A) Chinese medicine belly button application plus montmorillonite powder plus microecologics versus. montmorillonite powder. (B) Chinese medicine belly button application plus montmorillonite powder plus microecologics versus. montmorillonite powder plus microecologics.

## 5 Supplementary file 5

The sensitivity analysis results of each outcome measure.

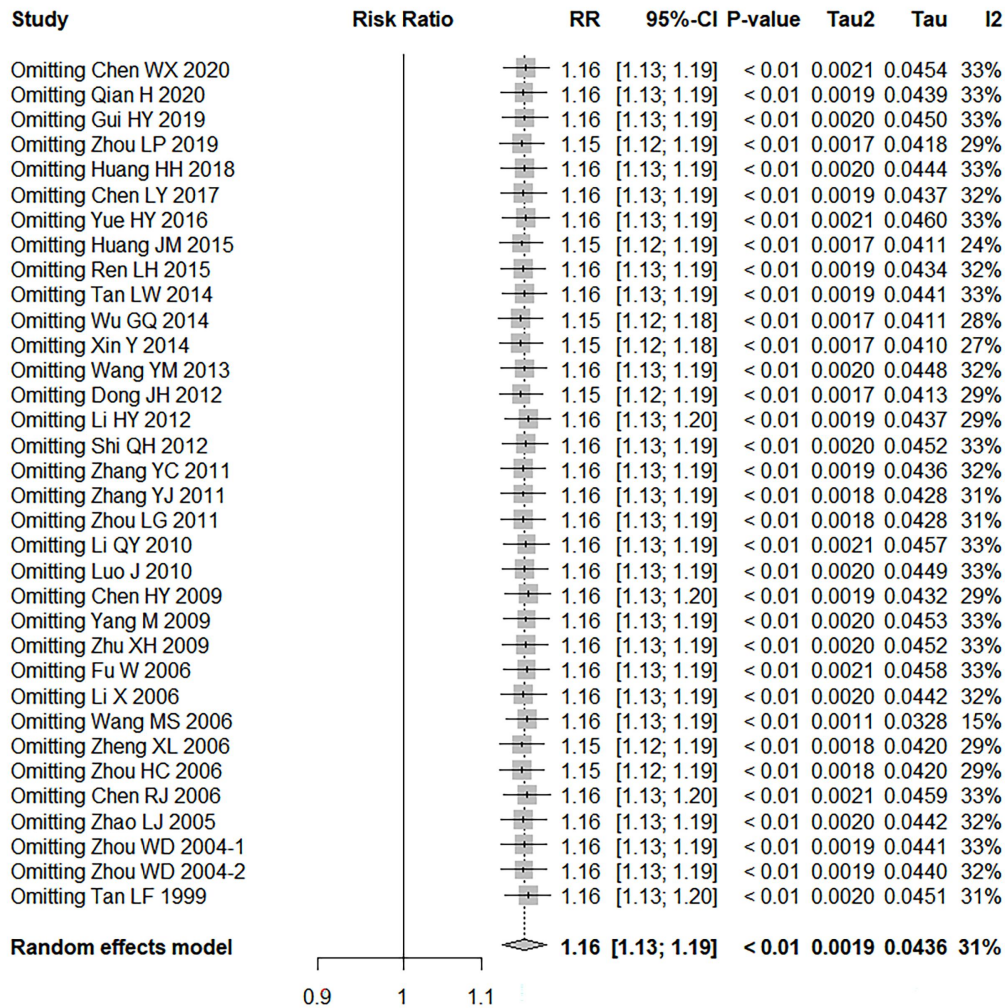

(A)

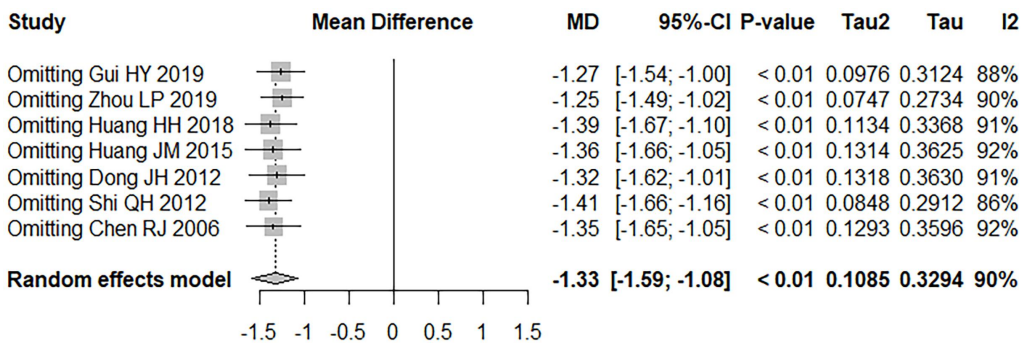

(B)

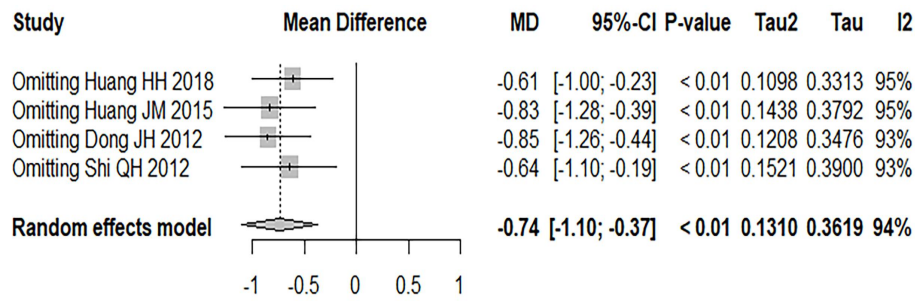

(C)

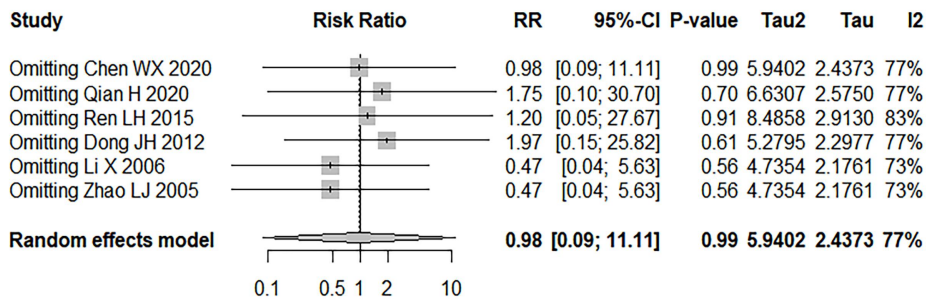

(D)

Supplementary Figure file 5, The sensitivity analysis results of each outcome measure. (A) clinical effectiveness. (B) time to diarrheal disappearance. (C) recovery time of dehydration. (D) adverse events.

## 6 Supplementary file 6

The specific trajectory plots and density plots.

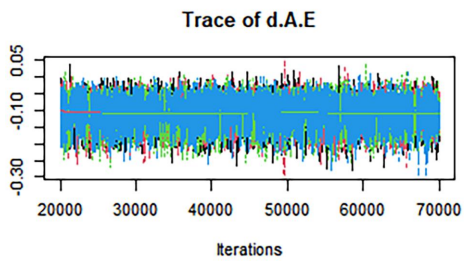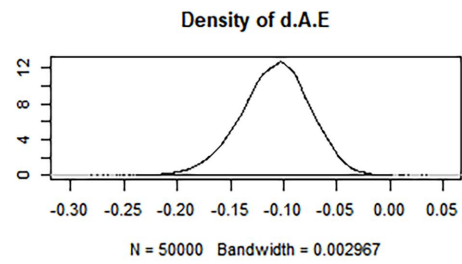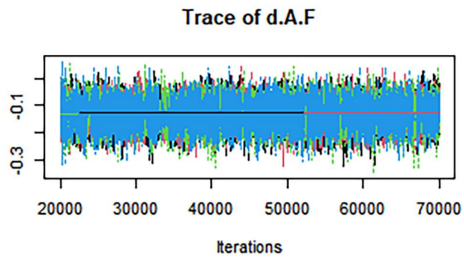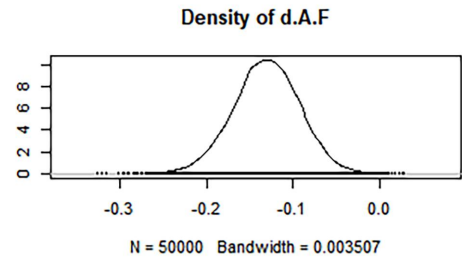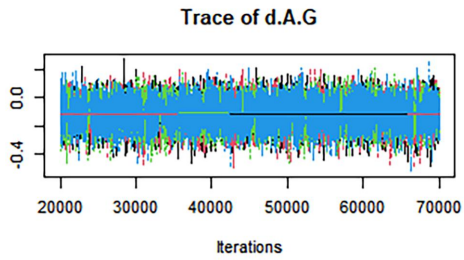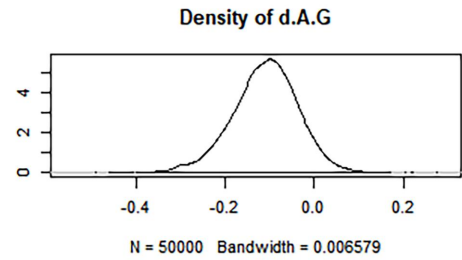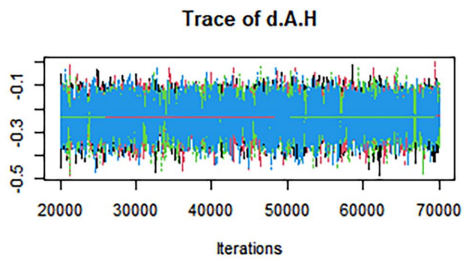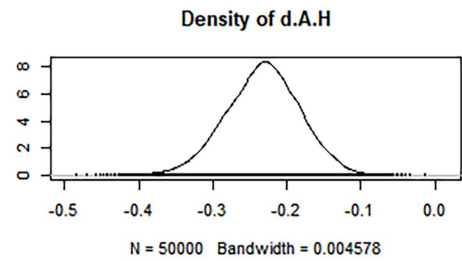

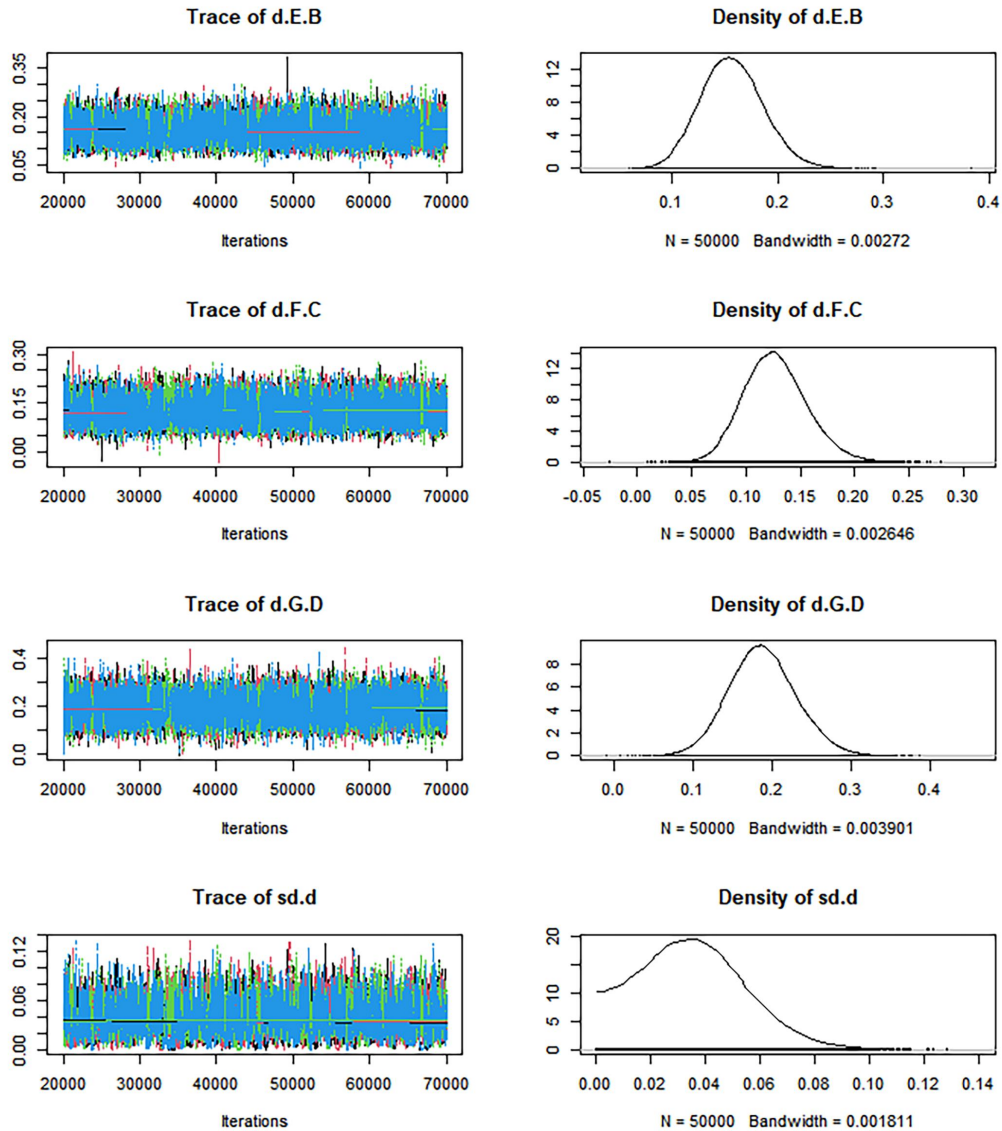

Supplementary Figure file 6, The specific trajectory maps and density plots of clinical effectiveness. Abbreviations in Figure file 6, A: Chinese medicine belly button application. B: Chinese medicine belly button application plus montmorillonite powder. C: Chinese medicine belly button application plus montmorillonite powder plus microecologics. D: Chinese medicine belly button application plus montmorillonite powder plus anti-infectives. E: montmorillonite powder. F: montmorillonite powder plus microecologics. G: montmorillonite powder plus anti-infectives. H: montmorillonite powder plus anti-infectives plus microecologics.

## 7 Supplementary file 7

Brooks-Gelman-Rubin diagnostic plots

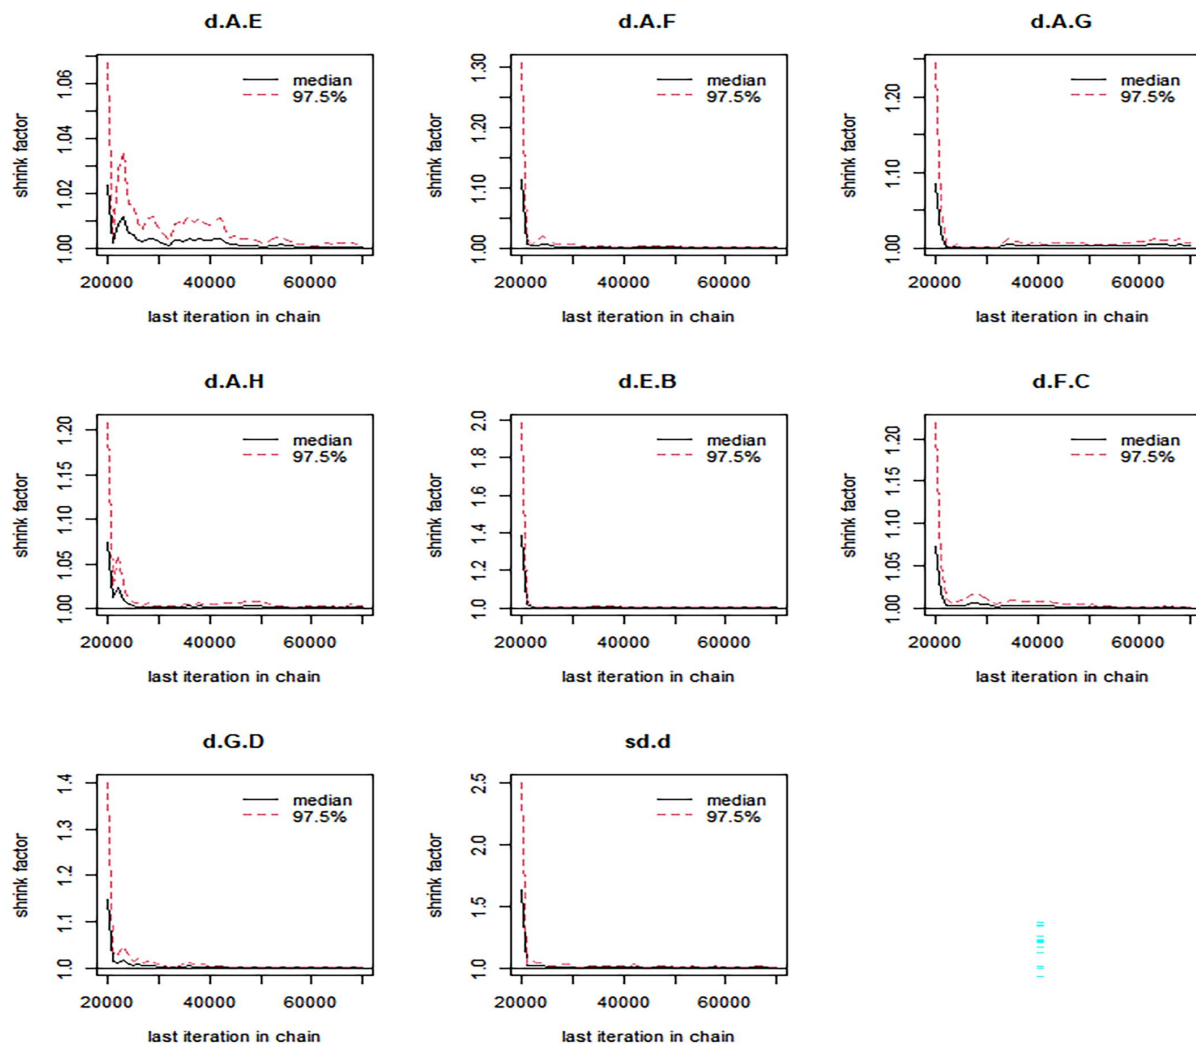

Supplementary Figure file 7, Brooks-Gelman-Rubin diagnostic plots of clinical effectiveness. Abbreviations in Figure file 7, A: Chinese medicine belly button application. B: Chinese medicine belly button application plus montmorillonite powder. C: Chinese medicine belly button application plus montmorillonite powder plus microecologies. D: Chinese medicine belly button application plus montmorillonite powder plus anti-infectives. E: montmorillonite powder. F: montmorillonite powder plus microecologies. G: montmorillonite powder plus anti-infectives. H: montmorillonite powder plus anti-infectives plus microecologies.

8 Supplementary file 8

The forest plot for network meta-analysis heterogeneity test.

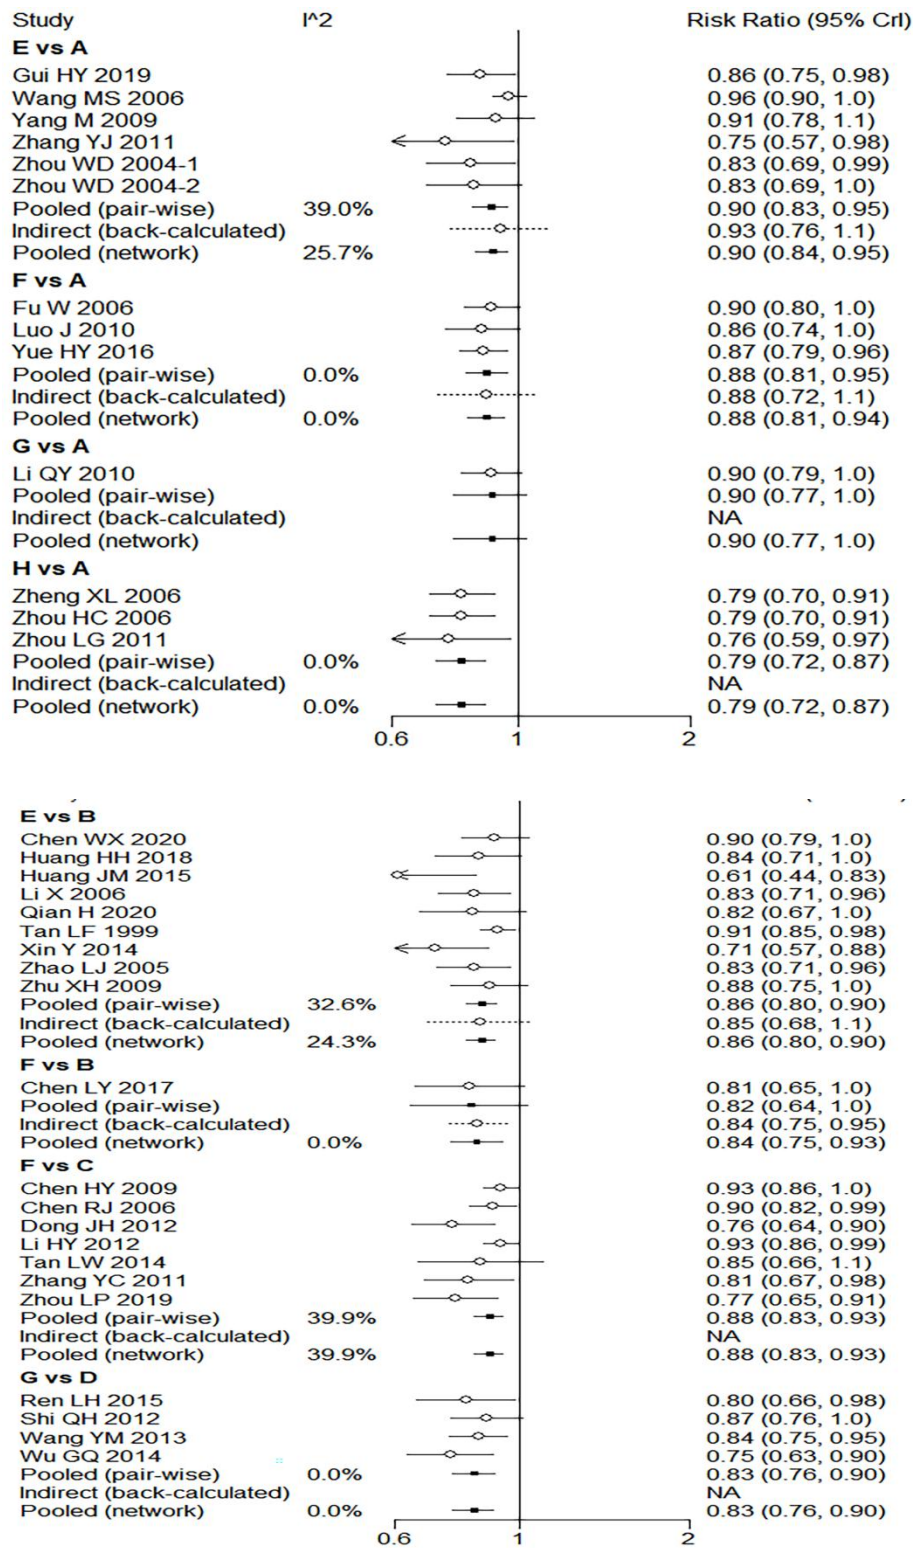



Supplementary Figure file 8, The forest plot for network meta-analysis heterogeneity test. Abbreviations in Figure file 8, A: Chinese medicine belly button application. B: Chinese medicine belly button application plus montmorillonite powder. C: Chinese medicine belly button application plus montmorillonite powder plus microecologics. D: Chinese medicine belly button application plus montmorillonite powder plus anti-infectives. E: montmorillonite powder. F: montmorillonite powder plus microecologics. G: montmorillonite powder plus anti-infectives. H: montmorillonite powder plus anti-infectives plus microecologics.

## 9 Supplementary file 9

The node splitting analysis of clinical effectiveness.

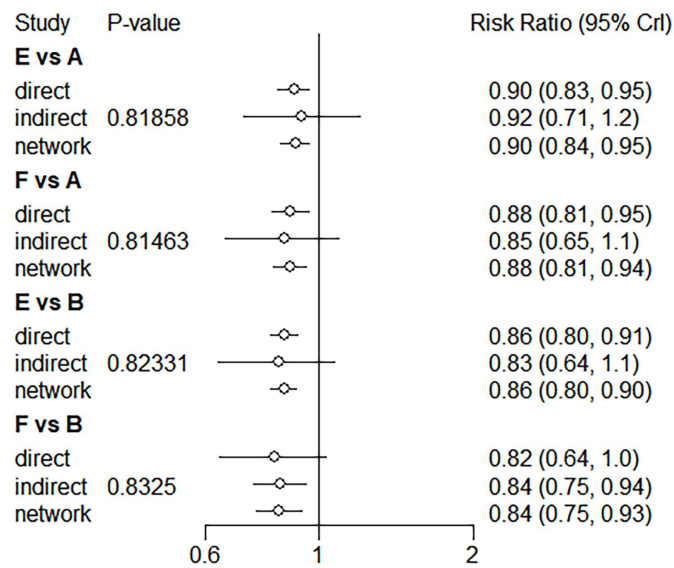

Supplementary Figure file 9, The node splitting analysis of clinical effectiveness. Abbreviations in Figure file 9, A: Chinese medicine belly button application. B: Chinese medicine belly button application plus montmorillonite powder. E: montmorillonite powder. F: montmorillonite powder plus microecologics.

**10 Supplementary file 10**

The publication bias chart for other outcome measures.

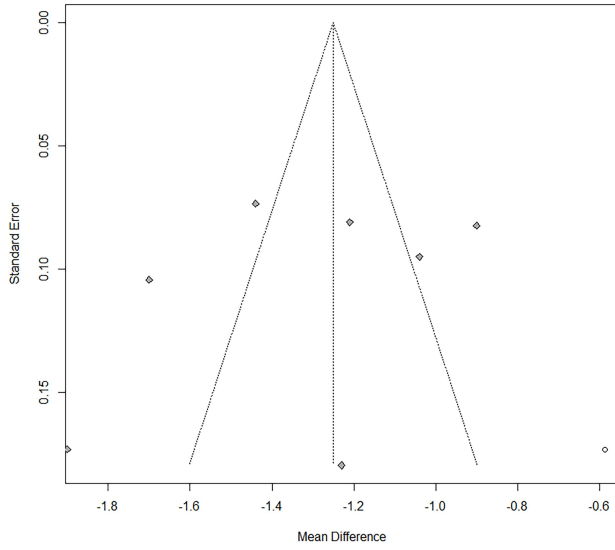

(A)

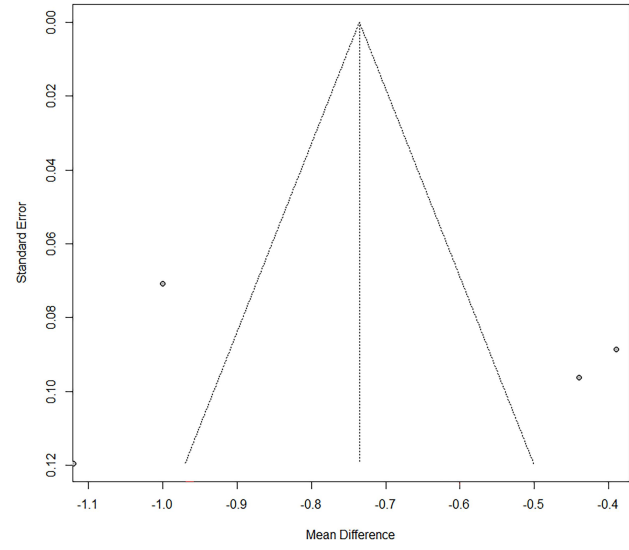

(B)

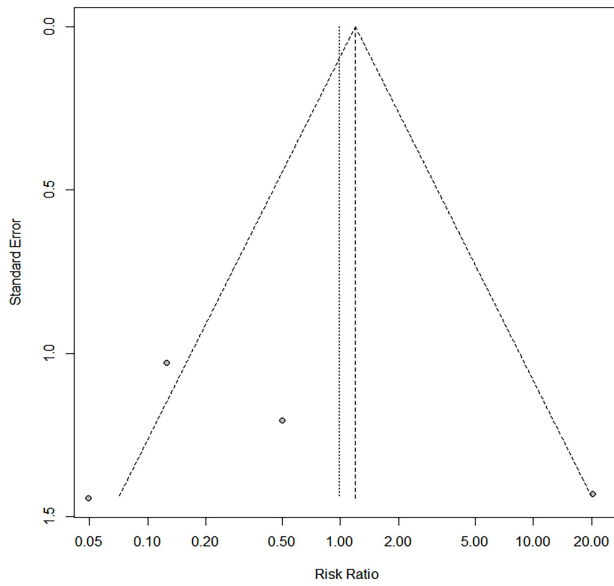

(C)

Supplementary Figure file 10, The publication bias chart for other outcome measures.(A) time to diarrheal disappearance. (B) recovery time of dehydration. (C) adverse events.

## 11 Supplementary file 11

Contribution plot for the clinical effectiveness.

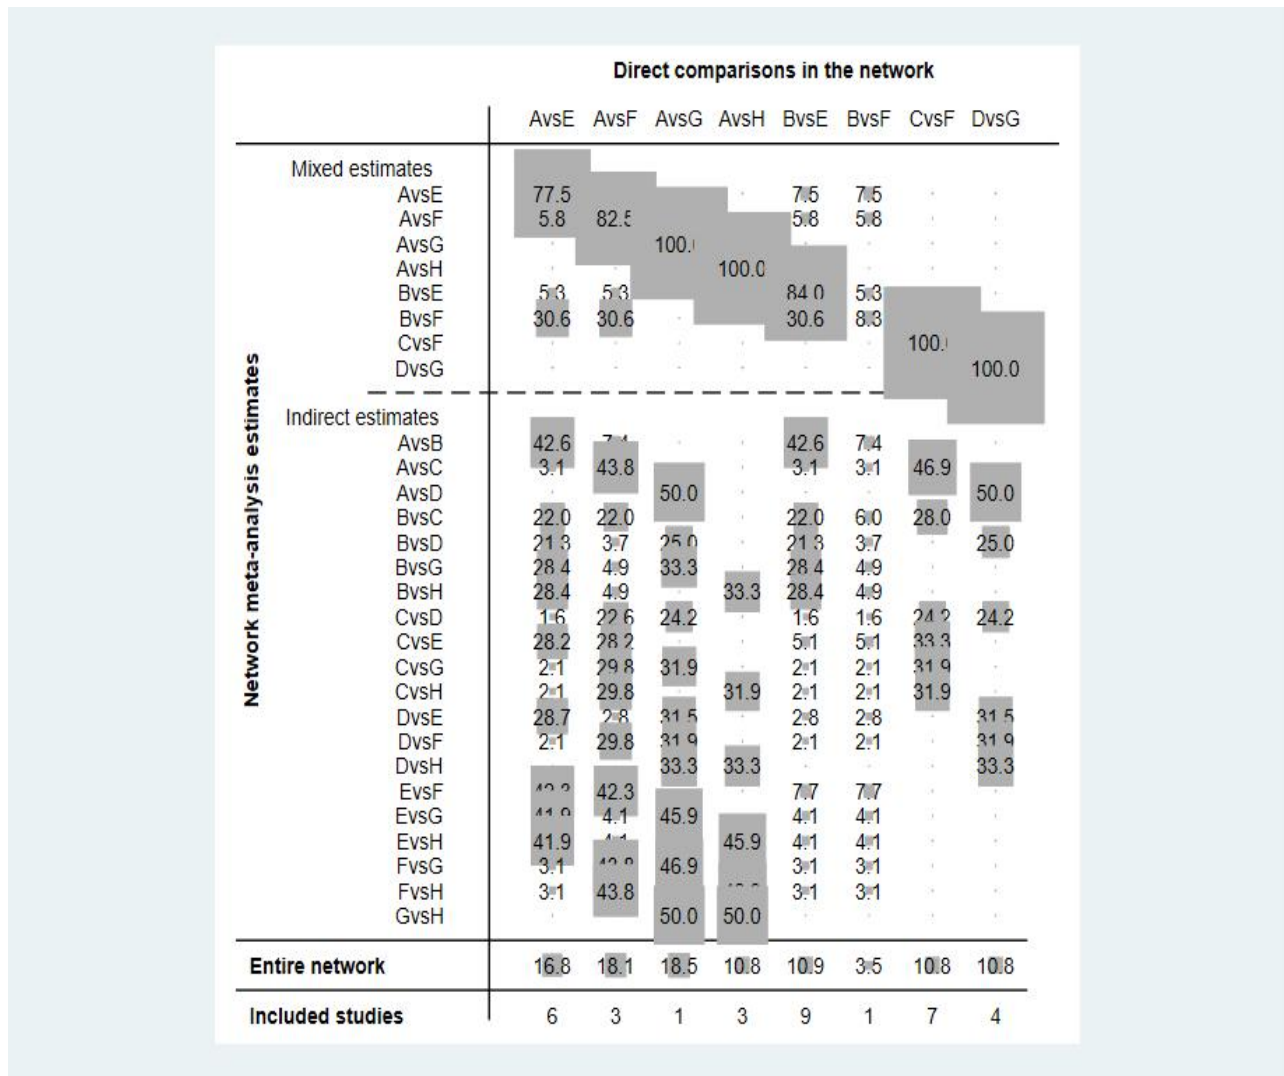

Supplementary Figure file 11, Contribution plot for the clinical effectiveness. The size of each square is proportional to the weight attached to each direct summary effect (horizontal axis) for the estimation of each network summary effects (vertical axis). The numbers re-express the weights as percentages. (A: Chinese medicine belly button application. B: Chinese medicine belly button application plus montmorillonite powder. C: Chinese medicine belly button application plus montmorillonite powder plus microecologies. D: Chinese medicine belly button application plus montmorillonite powder plus anti-infectives. E: montmorillonite powder. F: montmorillonite powder plus microecologies. G: montmorillonite powder plus anti-infectives. H: montmorillonite powder plus anti-infectives plus microecologies).

**12 Supplementary file S12**

The detailed information of 33 included studies in the network meta-analysis.

| Number | Study Title                                                                                                                                | Author(s)                            | Year |
|--------|--------------------------------------------------------------------------------------------------------------------------------------------|--------------------------------------|------|
| 1      | Safety study of Chinese medicine preparation "Xiangren Navel Patch" in medical institutions                                                | Chen WX                              | 2020 |
| 2      | Integrated Traditional Chinese and Western Medicine in Treating Infantile Diarrhea.                                                        | Qian H                               | 2020 |
| 3      | Clinical efficacy of Chinese herbal medicine self-formulated formula for umbilical cord application in the treatment of childhood diarrhea | Gui HY                               | 2019 |
| 4      | The efficacy of Chinese herbal compresses in synergy with Western medicine in the treatment of childhood autumn diarrhea.                  | Zhou LP, Yu CH, Xu XF, Xu GQ, Liu KW | 2019 |
| 5      | Clinical observation of 48 cases of childhood diarrhea treated with the aid of Chinese medicine applied to the umbilical cord.             | Huang HH, Qin L, Dai YQ, Lin XX      | 2018 |
| 6      | The efficacy of Wang's Bao Chi Pills applied to the umbilical cord in treating 60 cases of diarrhea in infants and children                | Chen LY                              | 2017 |
| 7      | Effective observation on treating infantile diarrhea by umbilical compress based on TCM syndrome differentiation                           | Yue HY                               | 2016 |
| 8      | Clinical analysis of combined traditional Chinese and Western medicine in the treatment of childhood autumn diarrhea                       | Huang JM                             | 2015 |
| 9      | Efficacy of Chinese herbal medicine applied to the umbilical cord plus Simethicone enema in the treatment of childhood diarrhea.           | Ren LH, Cui SZ                       | 2015 |
| 10     | Clinical efficacy of umbilical cord treatment for childhood diarrhea in 30 cases.                                                          | Tan LW                               | 2014 |

|    |                                                                                                                                          |                                  |      |
|----|------------------------------------------------------------------------------------------------------------------------------------------|----------------------------------|------|
| 11 | Clinical effect analysis of topical umbilical paste in the treatment of pediatric diarrhea.                                              | Wu GQ.                           | 2014 |
| 12 | Efficacy of umbilical cord therapy with Similac in the treatment of childhood prolonged diarrhea.                                        | Xin Y, Suo YM                    | 2014 |
| 13 | Efficacy of Chinese herbal medicine applied to the umbilical cord as an aid in the treatment of childhood diarrhea.                      | Wang YM, He YX, Zhang YR, Liu JF | 2013 |
| 14 | Observation of 96 cases of autumn diarrhea in children treated with Chinese medicine and Western medicine.                               | Dong JH                          | 2012 |
| 15 | Umbilical Compress Therapy Combined with Smecta for 127 Cases of Acute Diarrhea in Infants                                               | Li HY, Dong YN, Pan W.           | 2012 |
| 16 | Experience of 100 cases of childhood diarrhea treated with a combination of Chinese medicine and Western medicine.                       | Shi QH                           | 2012 |
| 17 | Applying Granule of Chinese Medicine on Umbilicus to Treat Children Acute Diarrhea                                                       | Zhang YC                         | 2011 |
| 18 | Acupoint in treatment of acute diarrhea in children clinical observation of secondary lactose intolerance                                | Zhang YJ                         | 2011 |
| 19 | Study on the clinical efficacy of Chinese herbal medicine in the treatment of diarrheal diseases in infants and children.                | Zhou LG                          | 2011 |
| 20 | 60 cases of childhood autumn diarrhea treated with anti-diarrhea powder applied to the umbilical cord                                    | Li QY                            | 2010 |
| 21 | Clinical and experimental study on the treatment of childhood diarrhea by applying childhood antidiarrheal powder to the umbilical cord. | Luo J, YU Y, Ran ZL              | 2010 |

|    |                                                                                                                                                     |                                  |      |
|----|-----------------------------------------------------------------------------------------------------------------------------------------------------|----------------------------------|------|
| 22 | Effectiveness of combined treatment of childhood diarrhea with Chinese herbal compresses on Shen Que point and foot San Li injection                | Chen HY                          | 2009 |
| 23 | Treatment of 35 cases of childhood diarrhea with the combination of warming Chinese diarrhea relief powder and Yunnan Baiyao compresses.            | Yan M                            | 2009 |
| 24 | 48 cases of childhood diarrhea treated with childhood diarrhea with SiM.                                                                            | Zhu XH                           | 2009 |
| 25 | Analysis of the efficacy of Chinese herbal medicine applied to the umbilical cord in the treatment of pediatric autumn diarrhea                     | Fu W, He ZB, Ke YB               | 2006 |
| 26 | 64 cases of diarrhea in infants and children treated with a combination of traditional Chinese and Western medicine                                 | Li X, Wang GS, Zhang DQ.         | 2006 |
| 27 | 112 cases of childhood diarrhea treated with self-prepared anti-diarrheal spirit applied to the umbilical cord.                                     | Wang MS                          | 2006 |
| 28 | The efficacy of Chinese herbal medicine applied to the umbilical cord in the treatment of pediatric diarrhea.                                       | Zheng XL                         | 2006 |
| 29 | Clinical and experimental study on the treatment of childhood diarrhea by applying anti-diarrheal compressing spirit to the umbilical cord          | Zhou HC, Li HY, Chen HY, Zhao SZ | 2006 |
| 30 | Clinical efficacy of Chinese and western medicine applied to the umbilical cord for the treatment of autumn diarrhea in infants and young children. | Chen RJ, Yu Z, Wu WQ             | 2006 |
| 31 | The efficacy of combined Chinese and Western medicine in treating 64 cases of diarrhea in infants and young children                                | Zhao LJ, Chen Y                  | 2005 |

|    |                                                                                                                                    |         |      |
|----|------------------------------------------------------------------------------------------------------------------------------------|---------|------|
| 32 | The efficacy of anti-diarrheal cream applied to the umbilical cord in treating 96 cases of autumn diarrhea in infants and children | Zhou WD | 2004 |
| 33 | 153 cases of autumn diarrhea in infants treated with navel warming cream                                                           | Tan LF  | 1999 |

---
